# Supplementary material for: Extension of molecules with an inverted singlet–triplet gap with conjugated branches to alter the oscillator strength
Source: Royal Society of Chemistry journal article supplement (doi:10.1039/d3cp05580a), 2024-01-01
Supplement: d3cp05580a1.pdf [file d3cp05580a1.pdf]

## Supplementary Information

# Extension of Molecules with Inverted Singlet-Triplet Gap with Conjugated Branches to Alter the Oscillator Strength

*Hwon Kim<sup>a</sup>, Gregory D. Scholes<sup>b</sup>, Seung Kyu Min<sup>a</sup>*

*a. Department of Chemistry, Ulsan National Institute of Science and Technology (UNIST), South Korea*

*b. Department of Chemistry, Princeton University, Princeton, New Jersey 08544, USA*

## Active space used for CASSCF

### Molecule 1

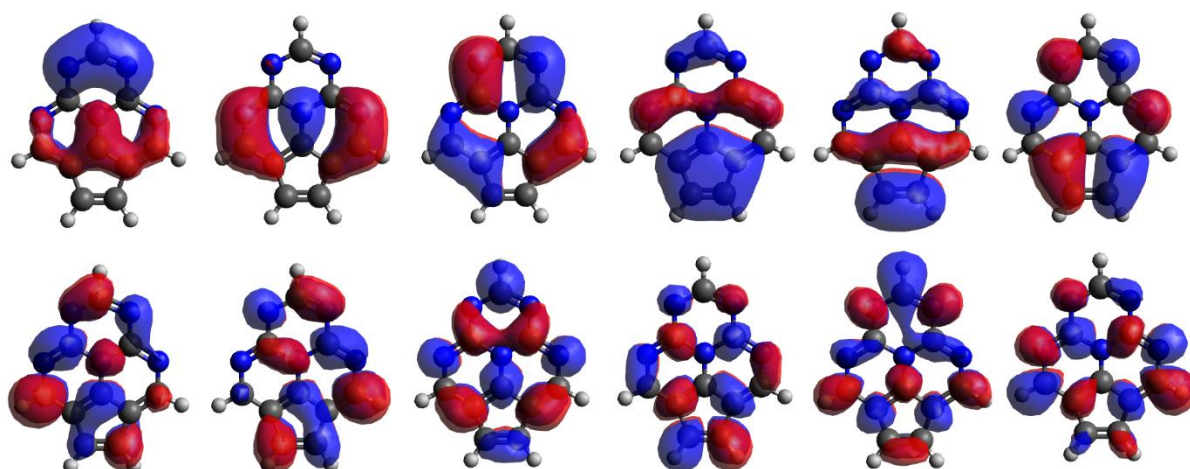

Figure S1. Active space used for Molecule 1

### Molecule 2

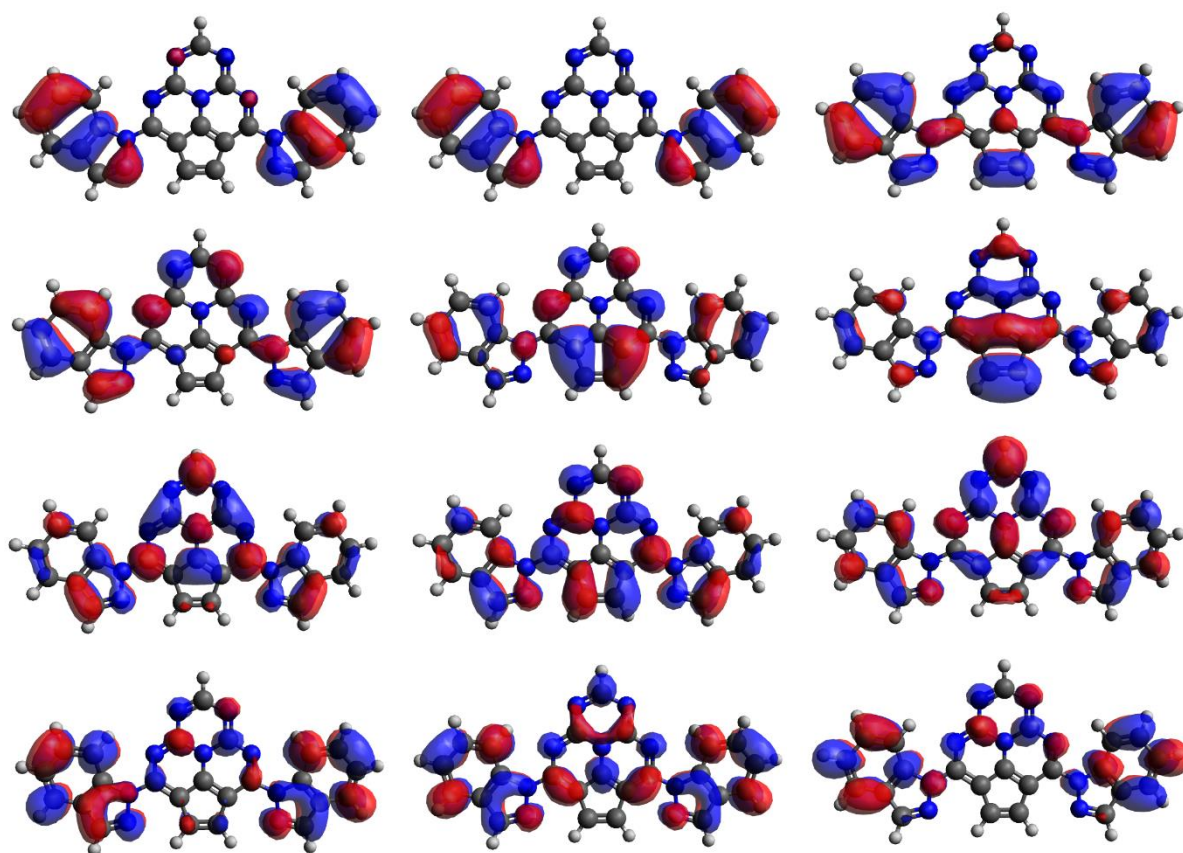

Figure S2. Active space used for Molecule 2

Molecule 3t

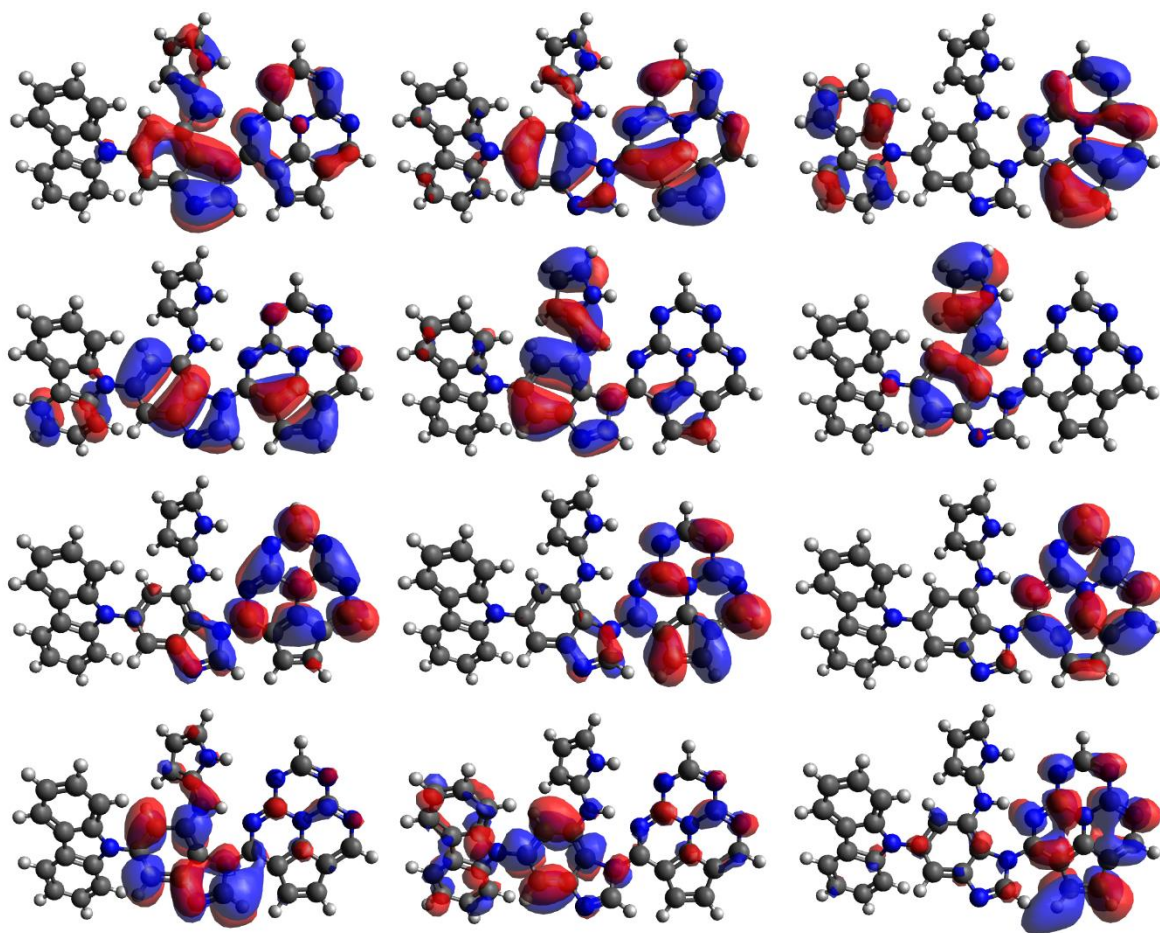

Figure S3. Active space used for Molecule 3t

Molecule 4

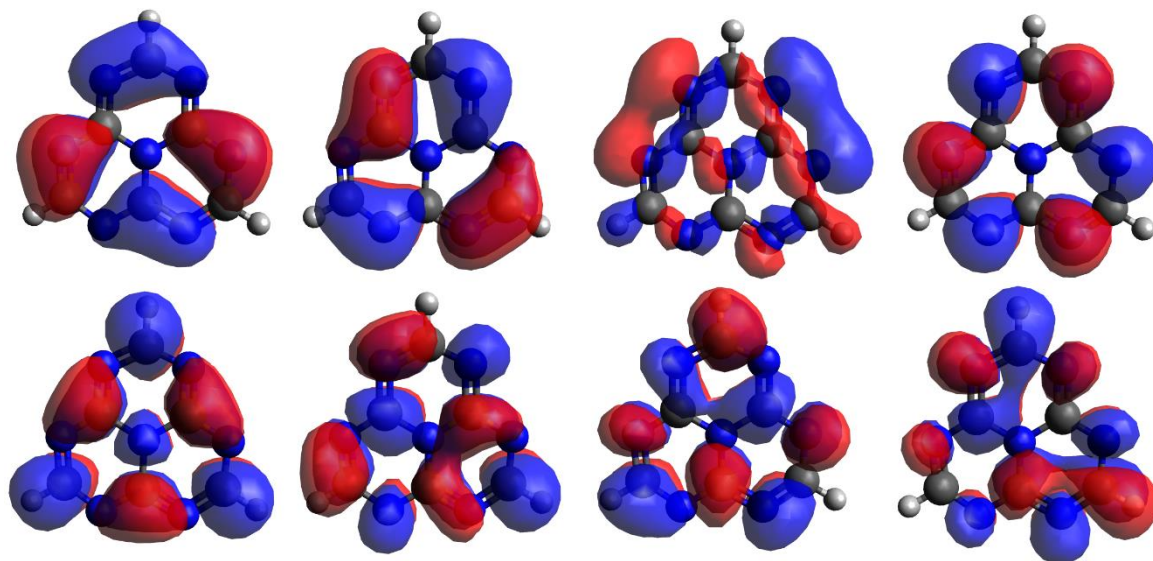

Figure S4. Active space used for the CASSCF (8,8) step of Molecule 4

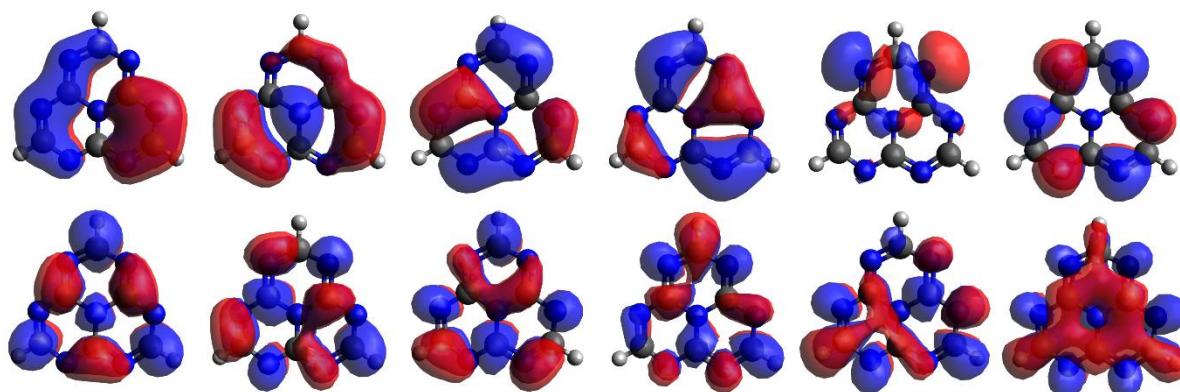

Figure S5. Active space used for the CASSCF (12,12) step of Molecule 4

Molecule 5t

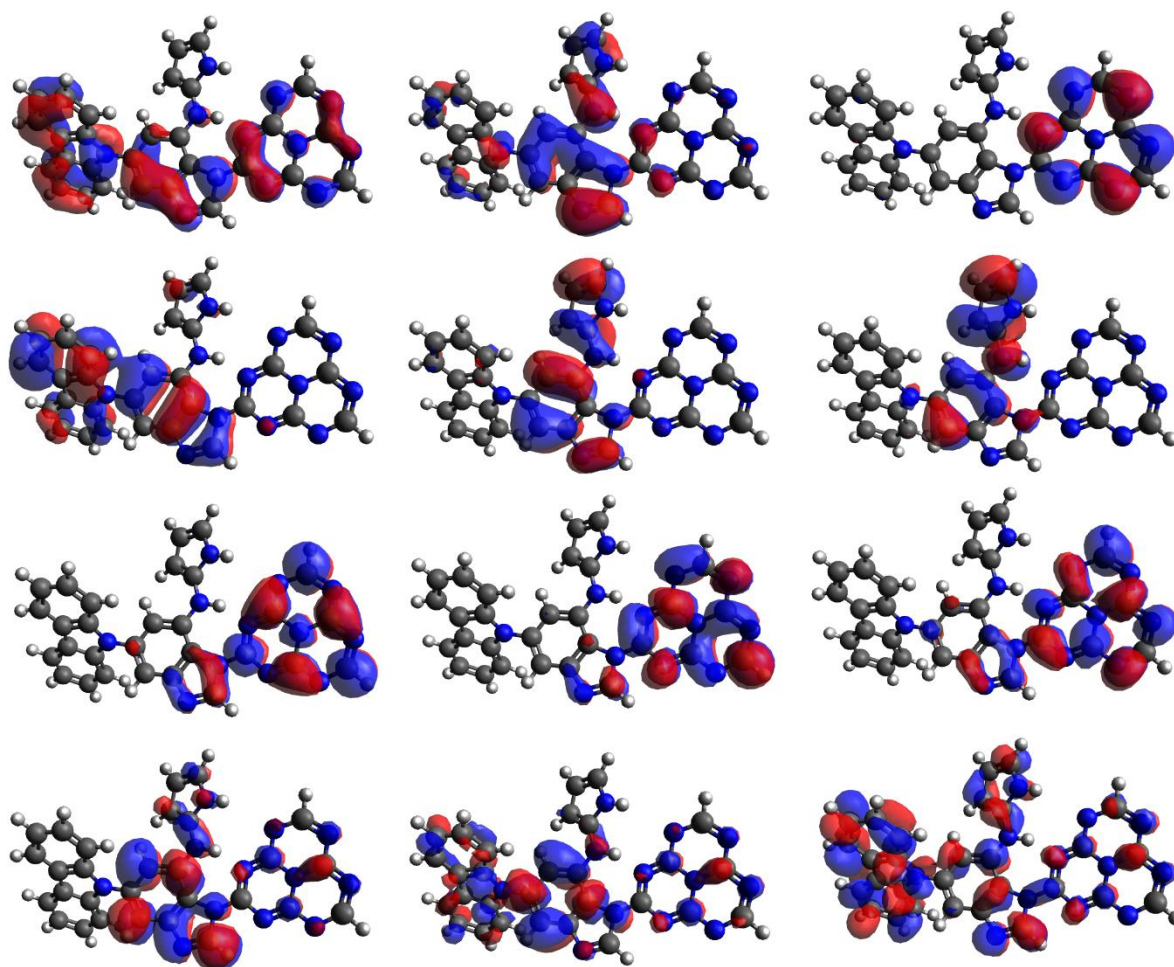

Figure S6. Active space used for Molecule 5t

### Molecule 6

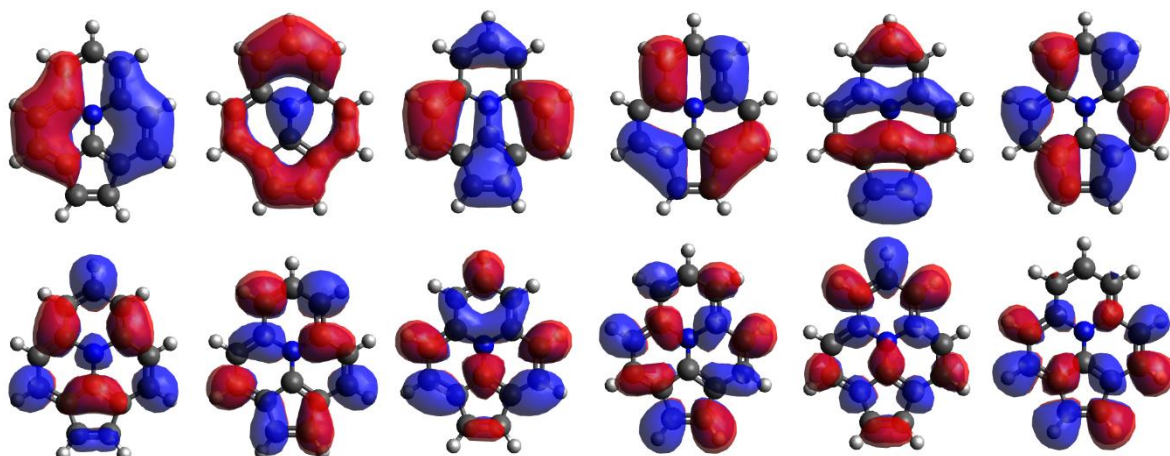

Figure S7. Active space used for Molecule 6

### Molecule 7t

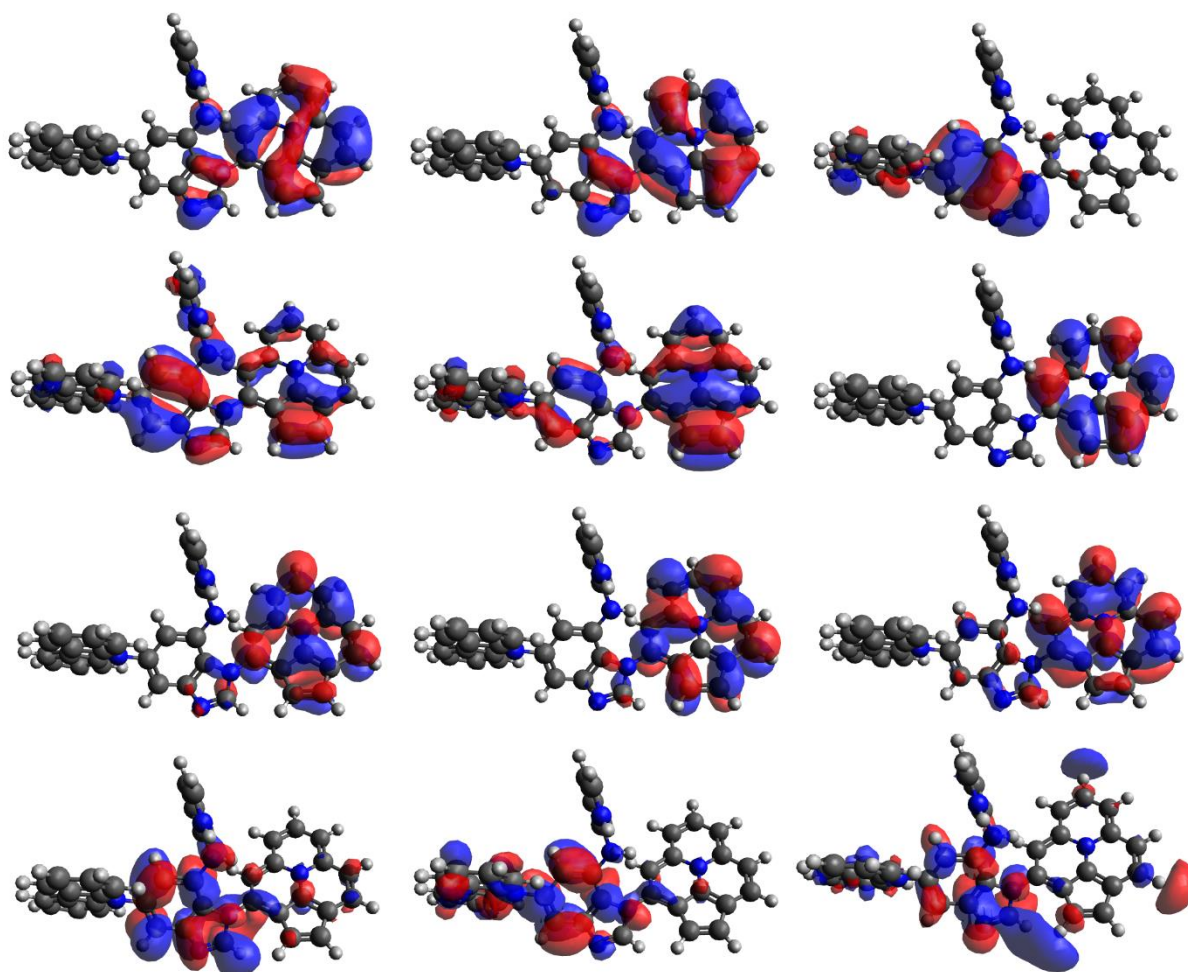

Figure S8. Active space used for Molecule 7t

## Interaction with 2UE DEC

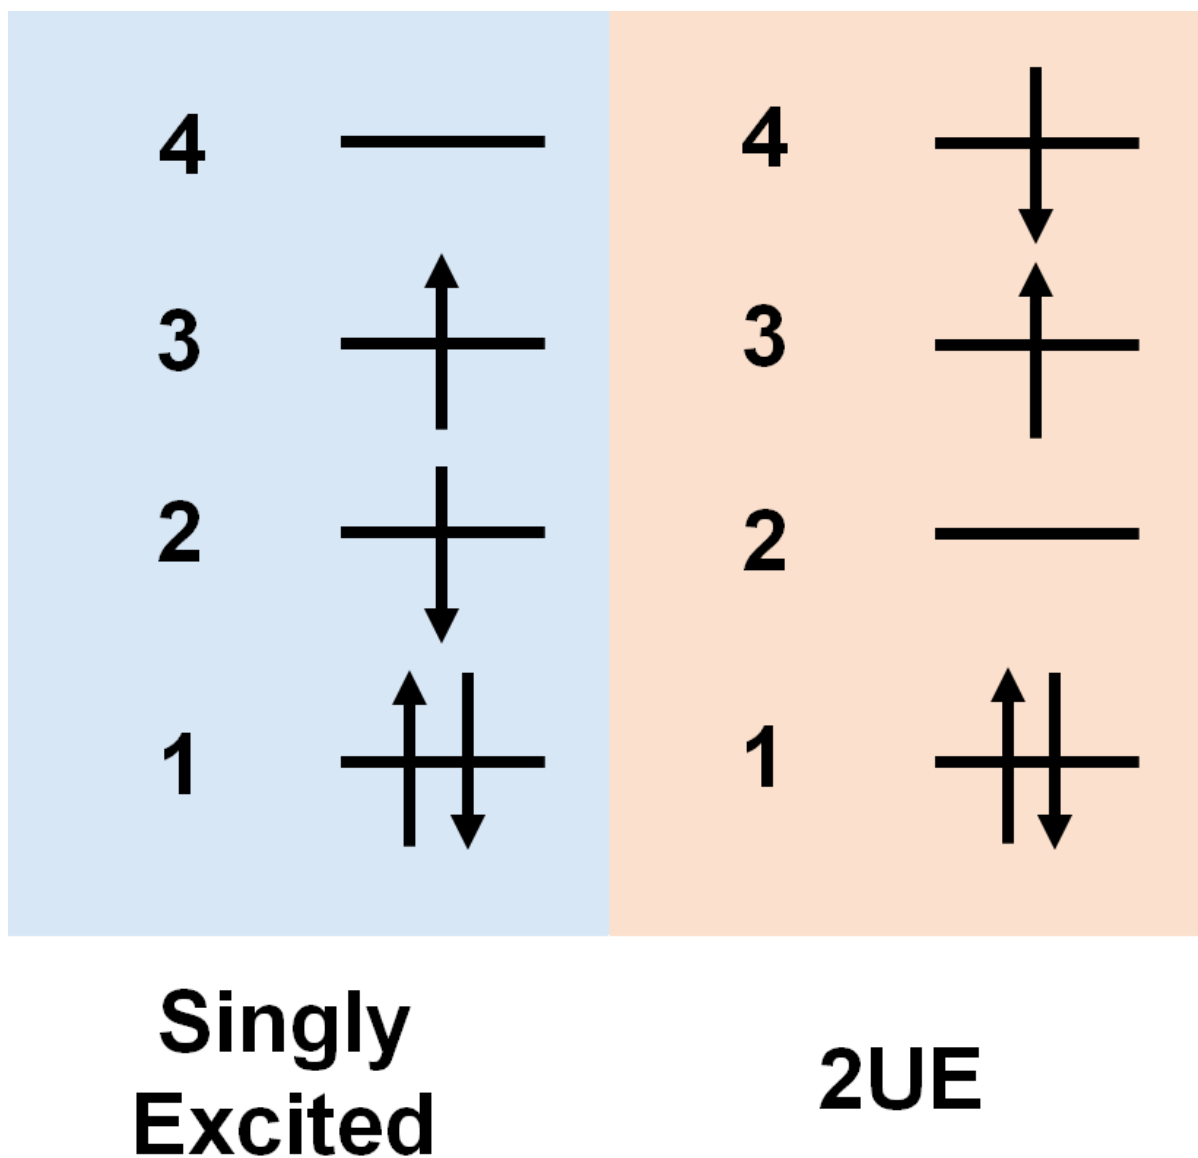

Figure S9. The electron configuration for the zeroth-order singly excited state with HOMO-LUMO excitation and the 2UE doubly excited state

The configuration state function (CSF) made with the configurations shown in Figure S10 is

$$|\psi_{Singly\ Excited}^{Singlet}\rangle = \frac{1}{\sqrt{2}}|\varphi_1^\alpha\varphi_1^\beta\varphi_2^\alpha\varphi_3^\beta\rangle - \frac{1}{\sqrt{2}}|\varphi_1^\alpha\varphi_1^\beta\varphi_2^\beta\varphi_3^\alpha\rangle$$

$$|\psi_{Singly\ Excited}^{Triplet}\rangle = \frac{1}{\sqrt{2}}|\varphi_1^\alpha\varphi_1^\beta\varphi_2^\alpha\varphi_3^\beta\rangle + \frac{1}{\sqrt{2}}|\varphi_1^\alpha\varphi_1^\beta\varphi_2^\beta\varphi_3^\alpha\rangle$$

$$|\psi_{2UE}^{Singlet}\rangle = \frac{1}{\sqrt{2}}|\varphi_1^\alpha\varphi_1^\beta\varphi_3^\alpha\varphi_4^\beta\rangle - \frac{1}{\sqrt{2}}|\varphi_1^\alpha\varphi_1^\beta\varphi_3^\beta\varphi_4^\alpha\rangle$$

$$|\psi_{2UE}^{Triplet}\rangle = \frac{1}{\sqrt{2}}|\varphi_1^\alpha\varphi_1^\beta\varphi_3^\alpha\varphi_4^\beta\rangle + \frac{1}{\sqrt{2}}|\varphi_1^\alpha\varphi_1^\beta\varphi_3^\beta\varphi_4^\alpha\rangle$$

The coupling term between each spin multiplicity is

$$\begin{aligned} \langle \psi_{Singly\ Excited}^{Singlet} | \hat{H} | \psi_{2UE}^{Singlet} \rangle \\ = \langle \varphi_2 | \hat{h} | \varphi_4 \rangle + 2\langle \varphi_1\varphi_2 | \varphi_1\varphi_4 \rangle - \langle \varphi_1\varphi_2 | \varphi_4\varphi_1 \rangle + \langle \varphi_3\varphi_2 | \varphi_3\varphi_4 \rangle \\ + \langle \varphi_2\varphi_3 | \varphi_3\varphi_4 \rangle \end{aligned}$$

$$\begin{aligned} \langle \psi_{Singly\ Excited}^{Triplet} | \hat{H} | \psi_{2UE}^{Triplet} \rangle \\ = -\langle \varphi_2 | \hat{h} | \varphi_4 \rangle - 2\langle \varphi_1\varphi_2 | \varphi_1\varphi_4 \rangle + \langle \varphi_1\varphi_2 | \varphi_4\varphi_1 \rangle - \langle \varphi_3\varphi_2 | \varphi_3\varphi_4 \rangle \\ + \langle \varphi_2\varphi_3 | \varphi_3\varphi_4 \rangle \end{aligned}$$

from which cannot be determined which coupling is stronger as two are not multiples of each other.



## Characters of S<sub>1</sub> and T<sub>1</sub> states from SOS-B2GP-PLYP21 functional

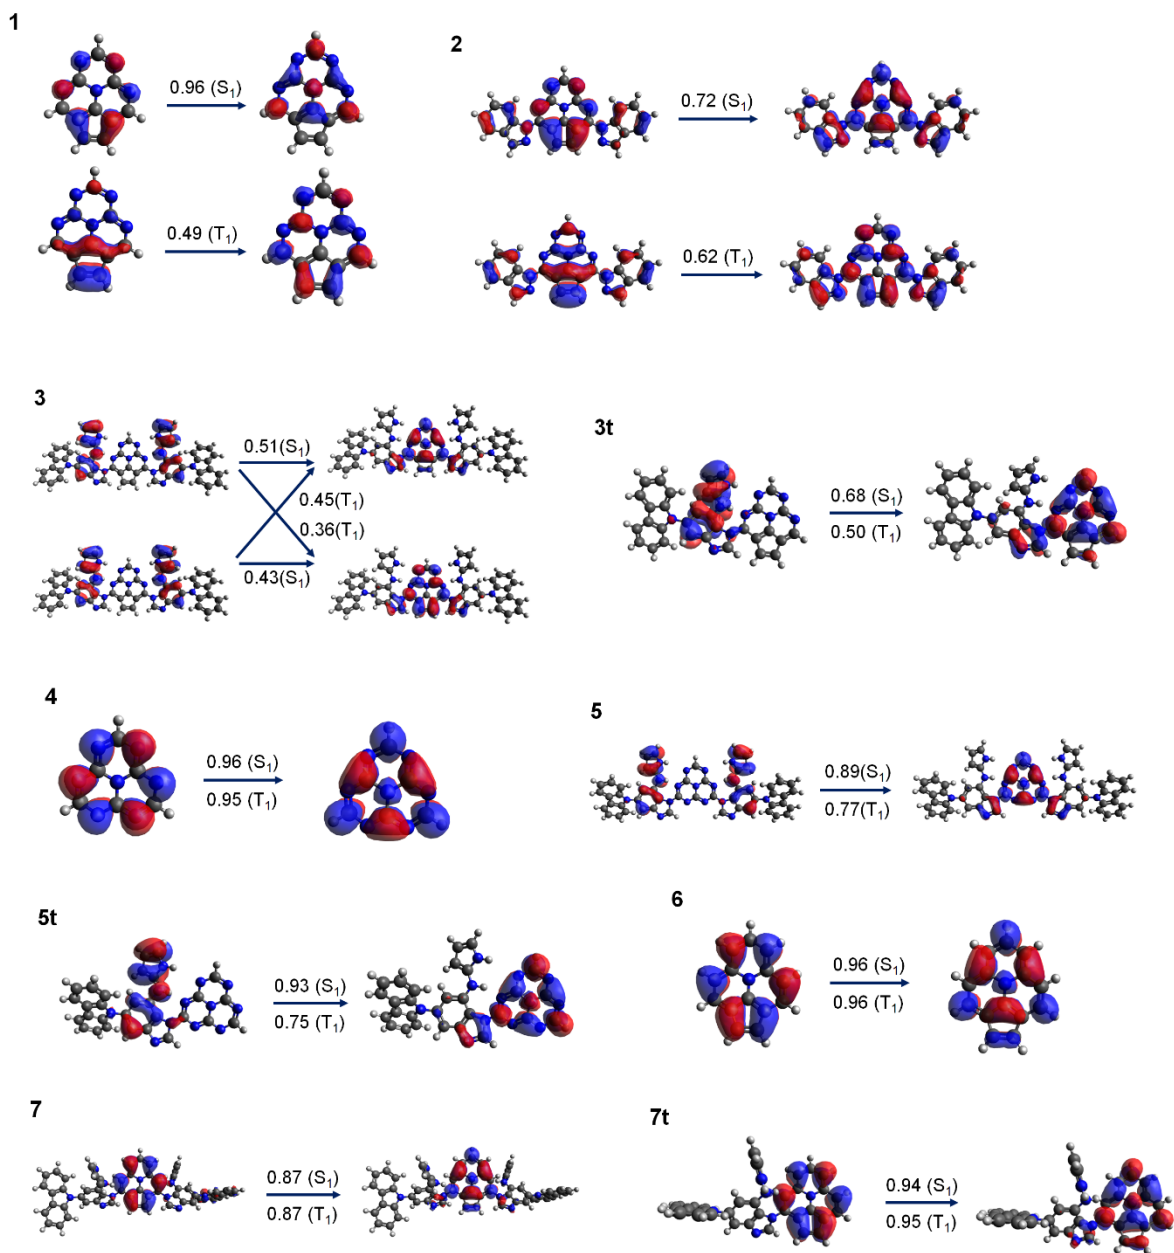

Figure S10. The characters of the molecules with the amplitudes of each transition, calculated with SOS-B2GP-PLYP21 functional

## Characters of $S_1$ and $T_1$ states from SCS-PBE-QIDH functional

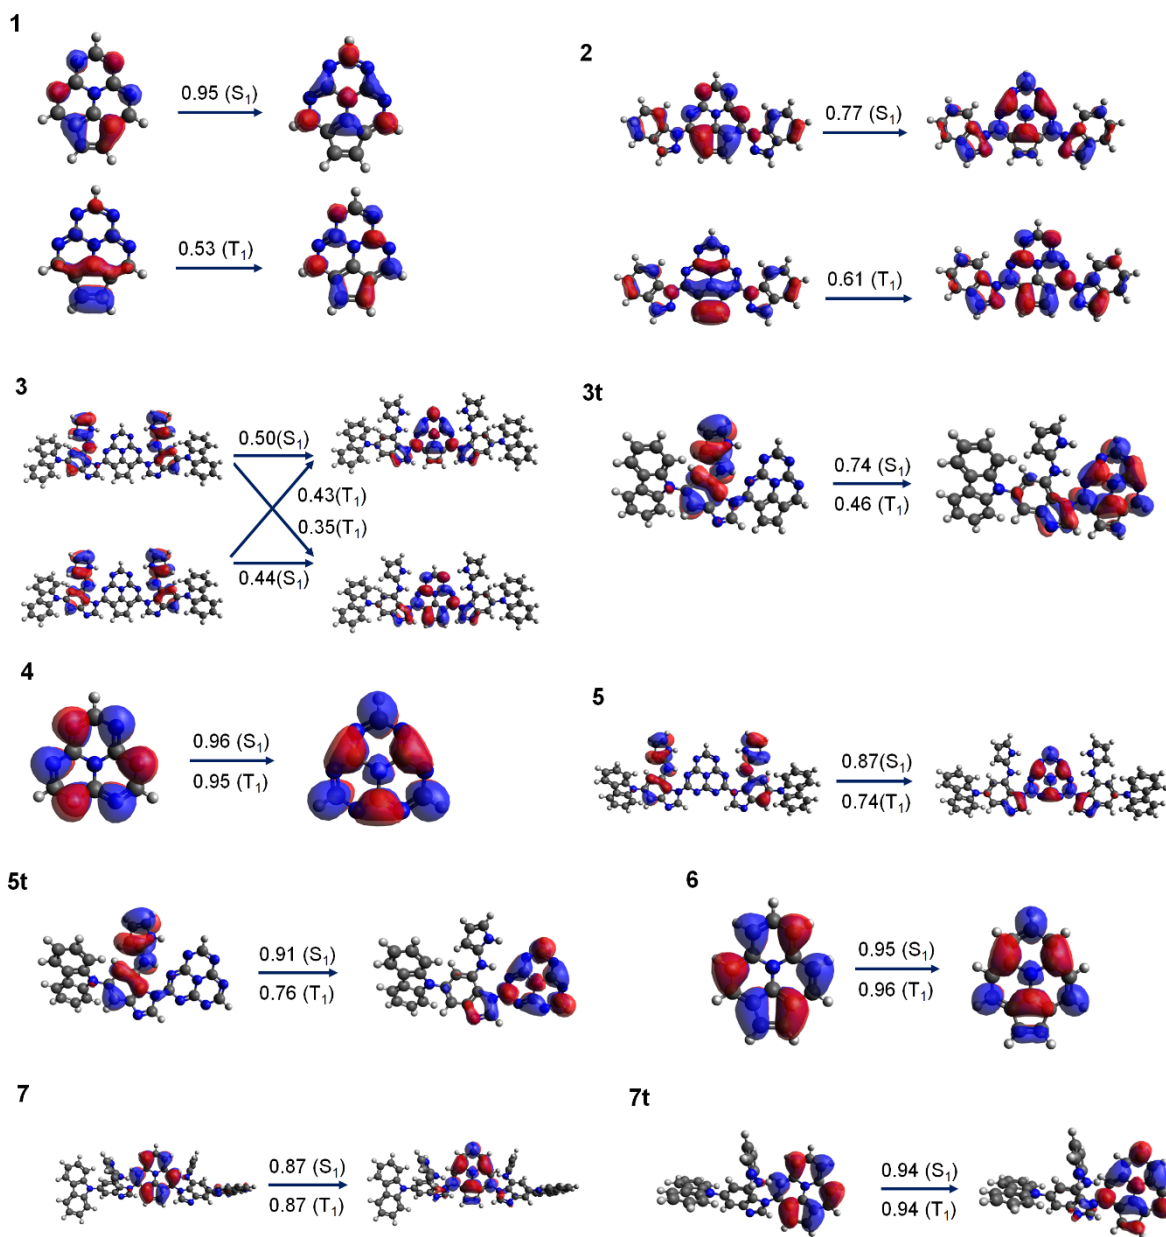

Figure S11. The characters of the molecules with the amplitudes of each transition, calculated with SCS-PBE-QIDH functional

### CT Distance ( $D_{CT}$ )

|           | SOS-B2GP-PLYP21       | SCS-PBE-QIDH          | SOS-RSX-QIDH          | CASSCF                |
|-----------|-----------------------|-----------------------|-----------------------|-----------------------|
| <b>1</b>  | 0.276                 | 0.268                 | 0.257                 | $2.55 \times 10^{-2}$ |
| <b>2</b>  | 0.179                 | 0.182                 | 0.182                 | 0.623                 |
| <b>3</b>  | 0.591                 | 0.574                 | 0.422                 | N/A                   |
| <b>3t</b> | 1.26                  | 1.23                  | 0.678                 | 1.53                  |
| <b>4</b>  | $6.89 \times 10^{-3}$ | $6.67 \times 10^{-3}$ | $6.62 \times 10^{-3}$ | $6.90 \times 10^{-2}$ |
| <b>5</b>  | 0.388                 | 0.381                 | 0.293                 | N/A                   |
| <b>5t</b> | 1.69                  | 1.66                  | 1.37                  | 2.09                  |
| <b>6</b>  | 0.434                 | 0.434                 | 0.430                 | $2.55 \times 10^{-2}$ |
| <b>7</b>  | $3.01 \times 10^{-2}$ | $3.10 \times 10^{-2}$ | $3.50 \times 10^{-2}$ | N/A                   |
| <b>7t</b> | 0.123                 | 0.123                 | 0.124                 | 0.105                 |

Table S1. The distance between the  $S_0$  and  $S_1$  state's barycenter of electron density. The unit of the distance is in picometers.

### Transition Dipole

|           | SOS-B2GP-PLYP21 | SCS-PBE-QIDH | SOS-RSX-QIDH | CASSCF |
|-----------|-----------------|--------------|--------------|--------|
| <b>1</b>  | 0.786           | 0.841        | 0.956        | 1.02   |
| <b>2</b>  | 2.69            | 2.87         | 3.07         | 2.97   |
| <b>3</b>  | 6.85            | 6.99         | 8.19         | N/A    |
| <b>3t</b> | 4.32            | 4.45         | 5.21         | 3.36   |
| <b>4</b>  | 0.00            | 0.00         | 0.00         | 0.200  |
| <b>5</b>  | 6.73            | 6.85         | 7.94         | N/A    |
| <b>5t</b> | 3.93            | 4.02         | 4.78         | 3.88   |
| <b>6</b>  | 0.474           | 0.489        | 0.505        | 0.504  |
| <b>7</b>  | 1.14            | 1.16         | 1.16         | N/A    |
| <b>7t</b> | 0.665           | 0.684        | 0.690        | 0.232  |

Table S2. The transition dipole of the  $S_0$ - $S_1$  transitions. The unit is in Debye.

## Scatter plot of $V_{DL}$ and Transition Dipole

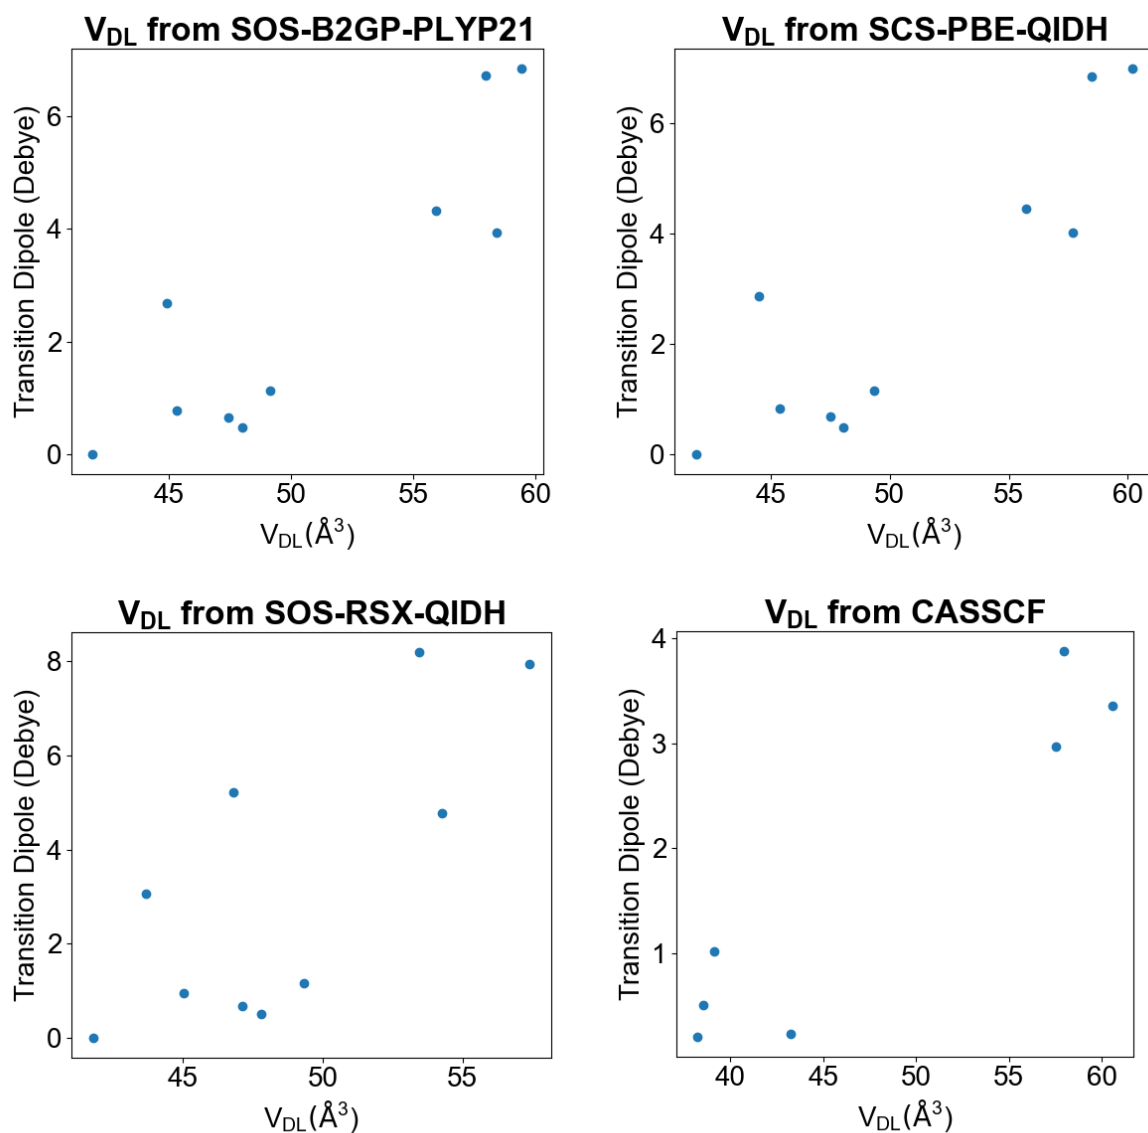

Figure S12. Scatter plot of  $V_{DL}$  and transition dipole from each functionals and the CASSCF calculation. CASSCF shows especially strong correlation with the four molecules with localized excitations (**1**, **4**, **6**, **7t**) having  $V_{DL}$  under  $45 \text{ \AA}^3$  and transition dipole of 1D or less and the three molecules with delocalized excitations (**2**, **3t**, **5t**) having  $V_{DL}$  above  $55 \text{ \AA}^3$  and transition dipole of 3D or more.

## Transition Density Matrix

The one-particle reduced transition density matrices (TDM) are provided in the basis of 12 optimized active orbitals from the CASSCF(12,12) calculations. The matrix elements are defined as  $T_{ij} = \langle S_1 | \hat{a}_i^\dagger \hat{a}_j | S_0 \rangle$ . Each block represents one row of TDM. The optimized orbitals are provided in the Supplementary\_Information.zip file in molden file format.

### Molecule 1

-2.64e-06 -1.26e-06 -1.85e-03 -3.67e-06 -4.00e-06 -1.17e-02 1.83e-06 5.75e-04 -3.14e-05  
1.06e-02 4.81e-06 8.11e-04

2.65e-06 -7.37e-06 8.16e-03 1.99e-05 -3.74e-06 4.37e-04 -8.73e-06 -2.00e-03 2.53e-05 3.38e-03  
-2.11e-05 6.72e-03

3.47e-03 9.10e-04 -2.04e-05 1.17e-02 2.69e-03 -8.19e-05 2.10e-02 -2.01e-04 -6.30e-02 -  
6.82e-05 -2.69e-03 -1.45e-05

2.55e-07 6.27e-06 -3.56e-03 2.09e-07 3.19e-05 3.39e-02 3.14e-04 5.14e-02 -1.39e-04 3.97e-02  
4.44e-06 1.09e-02

-1.07e-06 -1.63e-05 1.08e-02 4.51e-05 -2.00e-05 -6.54e-02 -3.60e-04 -7.44e-02 -6.36e-05 -  
1.96e-02 2.24e-05 8.95e-03

-6.71e-03 -1.79e-03 -2.55e-05 8.25e-03 -2.58e-02 2.53e-06 5.63e-02 -2.85e-04 -1.60e-02  
1.44e-05 1.16e-02 -4.18e-06

-1.03e-04 -9.14e-05 -6.05e-03 6.49e-04 -6.38e-04 1.19e+00 -4.64e-04 -7.70e-02 -1.76e-06  
8.21e-02 -4.44e-05 -3.25e-02

-8.47e-03 -2.33e-02 -1.84e-04 1.22e-01 -1.91e-01 -6.10e-03 -1.74e-02 4.93e-04 -5.04e-03 -  
4.19e-04 -5.73e-03 1.58e-04

-4.16e-05 2.08e-05 -1.14e-01 -2.25e-04 -1.17e-04 1.95e-01 -2.84e-05 -3.78e-03 5.60e-06  
1.67e-02 -1.93e-06 -1.24e-02

1.05e-02 3.25e-03 -8.46e-05 5.43e-02 -5.82e-02 8.93e-05 1.75e-03 -1.31e-05 1.09e-03 2.04e-06  
-1.17e-03 -5.05e-06

7.75e-06 -2.49e-05 -1.92e-02 -2.05e-05 5.59e-05 6.99e-02 -6.79e-06 -1.98e-03 3.62e-06  
7.56e-03 -6.48e-07 -8.62e-04

4.18e-03 1.77e-02 1.20e-05 1.79e-04 2.37e-02 -3.76e-05 -6.86e-04 -4.80e-07 3.51e-03 -6.31e-06  
-1.19e-03 1.09e-05

### Molecule 2

-1.66e-05 1.41e-03 -2.15e-06 6.46e-04 7.81e-03 -1.45e-05 -2.13e-03 -1.17e-05 2.33e-03 -  
5.68e-05 -5.31e-07 4.35e-04

1.06e-03 1.44e-05 4.77e-04 1.88e-06 4.28e-05 1.47e-03 -2.42e-06 2.08e-03 5.62e-05 2.40e-03  
-4.58e-04 3.21e-06

-8.36e-08 3.38e-05 -8.60e-07 -1.20e-03 -7.69e-03 -9.70e-06 4.19e-03 -9.63e-06 2.47e-04 -  
3.77e-06 -9.23e-06 4.13e-03

-3.95e-04 -1.84e-06 -1.50e-05 4.27e-06 1.90e-05 3.01e-03 2.52e-05 6.93e-03 -1.17e-05 -  
6.01e-04 3.33e-03 5.61e-06

-5.19e-03 -2.79e-05 7.96e-03 -4.97e-06 5.29e-05 6.61e-02 5.43e-05 8.37e-03 -1.22e-05 -  
1.02e-03 -6.73e-03 -3.26e-05

2.18e-05 -2.67e-03 -1.22e-05 -7.94e-03 -6.08e-02 -4.73e-05 1.37e-02 -4.35e-05 1.95e-03 -  
3.82e-05 6.84e-06 -1.71e-03

6.73e-02 5.57e-04 -1.15e-01 5.04e-04 1.96e-03 -1.16e+00 -2.67e-04 -8.36e-02 1.57e-04 8.84e-  
03 2.45e-02 7.21e-05

-6.02e-04 4.29e-02 6.08e-04 9.87e-02 6.30e-01 5.11e-03 2.10e-02 2.63e-04 8.78e-04 -5.14e-  
05 -8.37e-05 -4.88e-03

1.15e-02 5.79e-05 -2.17e-02 1.74e-05 -1.09e-03 -8.77e-02 -5.01e-05 -6.47e-03 2.41e-05  
1.08e-03 1.66e-03 1.62e-05

-2.12e-04 -4.06e-04 4.19e-04 3.09e-04 -6.29e-02 1.62e-03 -1.38e-03 1.27e-04 3.48e-04 -  
2.67e-05 -3.32e-05 6.06e-04

3.61e-05 1.07e-02 -1.72e-04 1.17e-02 -9.74e-02 -6.18e-04 -2.17e-03 -3.18e-05 -2.24e-04  
6.15e-06 3.23e-06 1.62e-03

-3.13e-02 -1.33e-04 4.71e-02 -2.67e-05 -2.66e-04 1.54e-01 3.73e-05 1.09e-02 -1.63e-05 -  
9.88e-04 -2.29e-03 -2.82e-06

### Molecule 3t

1.58e-04 2.15e-03 6.77e-04 -1.99e-03 2.13e-04 3.39e-03 -4.16e-03 -2.21e-03 -5.02e-03 4.58e-  
03 -7.62e-03 4.82e-03

-4.32e-04 2.98e-03 1.64e-03 -8.83e-04 2.00e-03 7.61e-03 1.96e-03 1.09e-03 -7.08e-03 -1.35e-  
02 2.87e-03 -2.52e-03

2.20e-04 4.89e-04 -3.51e-04 7.78e-04 -9.49e-04 -2.01e-03 1.35e-03 9.70e-04 -8.84e-03 -  
2.34e-02 4.02e-03 -2.80e-03

-1.17e-03 1.68e-04 2.65e-04 -5.38e-03 1.02e-03 4.40e-03 -2.74e-03 3.88e-03 4.03e-03 5.02e-  
04 -4.61e-03 -8.76e-04

-1.83e-03 -3.64e-03 2.50e-04 -3.55e-03 -2.21e-03 -1.67e-02 -1.60e-03 1.70e-03 -6.35e-03  
1.81e-03 -1.17e-03 -2.67e-03

1.88e-03 -3.97e-03 -3.35e-04 1.39e-03 -5.77e-03 -1.74e-02 -5.72e-03 -1.89e-03 4.15e-03  
2.05e-03 -3.56e-03 2.80e-03

-3.08e-02 1.47e-01 -7.06e-02 -5.33e-02 2.94e-01 1.11e+00 6.38e-03 1.73e-02 -4.01e-03 3.18e-  
03 2.09e-02 3.76e-03

-2.00e-02 1.02e-01 -3.76e-02 9.69e-02 1.44e-01 6.34e-01 -1.79e-03 2.08e-02 -4.44e-03 2.48e-03 1.33e-02 7.19e-03

-1.85e-02 1.23e-02 -1.61e-02 3.40e-03 -8.70e-03 3.00e-02 -5.85e-04 -1.62e-06 -1.53e-03 -1.15e-04 6.00e-04 7.53e-04

1.03e-02 -3.45e-02 -2.62e-02 6.21e-03 -6.86e-03 -2.88e-02 5.25e-04 1.42e-04 -1.09e-03 -3.27e-03 1.44e-03 -1.47e-03

-8.63e-03 -1.21e-02 9.74e-03 -3.19e-02 2.00e-02 6.91e-02 1.83e-03 -1.22e-03 4.65e-04 6.05e-05 8.90e-05 3.91e-04

6.21e-03 1.70e-02 -1.50e-02 -6.25e-03 1.31e-03 3.77e-02 4.62e-04 1.72e-04 5.35e-04 3.60e-04 2.77e-03 -2.55e-04

#### Molecule 4

-1.92e-04 -1.38e-04 3.31e-03 -1.59e-03 -3.35e-08 2.96e-02 2.23e-03 2.07e-02 5.12e-03 -5.17e-03 4.16e-03 -4.70e-04

7.39e-04 4.54e-04 1.86e-03 6.97e-03 2.74e-07 8.00e-03 -1.18e-03 3.42e-03 -4.71e-03 4.82e-04 -2.49e-02 -3.65e-04

-2.35e-03 3.67e-04 2.14e-03 -6.54e-03 -3.19e-07 -1.65e-03 4.67e-03 1.34e-02 -1.04e-01 -3.30e-04 -1.28e-02 -2.89e-03

-1.13e-03 3.45e-03 1.29e-02 -1.99e-05 8.74e-08 -1.48e-02 -5.79e-04 9.81e-02 1.41e-02 5.69e-03 1.31e-03 6.83e-04

-2.64e-08 8.87e-08 2.12e-07 2.91e-09 -7.51e-09 -1.82e-07 2.10e-08 3.14e-06 -1.19e-07 7.11e-07 1.36e-09 1.53e-08

-1.06e-03 -4.54e-04 -2.23e-03 -9.29e-03 -3.28e-07 3.59e-03 -8.15e-02 7.17e-04 -7.16e-03 3.63e-05 3.77e-03 -1.66e-02

1.15e-02 -1.40e-02 2.16e-02 1.84e-03 2.89e-07 -1.22e+00 -5.92e-03 -7.12e-02 8.08e-03 1.69e-02 1.07e-02 6.60e-03

2.77e-02 5.12e-03 2.31e-02 1.54e-01 4.99e-06 -2.47e-03 -6.45e-03 -1.30e-03 6.13e-03 8.53e-04 -6.10e-04 2.50e-03

6.81e-03 -3.31e-03 -1.50e-01 2.03e-02 -1.56e-07 -8.42e-02 1.24e-04 -1.53e-02 1.51e-03 5.38e-03 2.54e-03 1.58e-03

-7.83e-03 1.52e-04 -4.25e-03 -7.60e-03 5.65e-07 4.65e-03 1.84e-03 1.75e-04 -3.99e-03 -1.16e-04 -5.06e-03 -9.03e-04

5.17e-03 -3.25e-02 -8.77e-03 -1.99e-03 -4.73e-08 8.18e-03 6.45e-04 8.27e-03 8.89e-04 -5.80e-04 -5.83e-04 -7.09e-05

-6.30e-05 -5.06e-04 -7.22e-03 1.19e-04 -2.38e-09 -8.16e-02 1.09e-04 -4.63e-03 1.09e-03 9.50e-04 7.13e-04 4.37e-04

### Molecule 5t

2.16e-04 -1.64e-05 1.87e-05 6.00e-03 5.72e-03 -5.47e-02 1.54e-02 1.32e-02 -5.61e-03 1.14e-03 -5.65e-03 -6.06e-03

1.21e-03 -5.87e-04 -5.80e-04 -5.24e-03 -8.08e-05 9.41e-03 -3.40e-03 -1.28e-03 9.43e-03 -1.10e-03 1.82e-03 1.72e-03

-8.37e-05 -4.55e-04 -1.92e-03 4.81e-04 6.96e-05 1.66e-03 1.90e-04 -3.05e-03 -6.62e-03 -2.84e-03 5.64e-04 -1.48e-03

-4.91e-04 -1.57e-03 9.47e-04 6.43e-03 -1.48e-04 -3.52e-02 7.63e-03 5.32e-04 -1.85e-02 5.01e-03 2.95e-03 -8.18e-03

1.47e-03 2.14e-03 -3.17e-04 -5.13e-03 -3.96e-03 1.14e-02 -4.49e-03 1.04e-02 4.70e-02 -1.29e-02 5.07e-03 4.36e-03

-1.59e-03 -2.37e-03 1.86e-03 1.95e-02 3.11e-03 -8.97e-02 1.71e-02 4.81e-03 -1.56e-03 2.33e-03 6.48e-03 1.10e-04

-1.88e-02 -2.44e-02 2.53e-02 2.77e-01 8.14e-02 -1.26e+00 9.66e-02 5.45e-02 3.42e-02 -9.92e-03 4.77e-03 1.09e-02

2.15e-02 1.82e-02 -1.27e-02 -6.37e-02 6.35e-03 2.43e-02 6.93e-04 1.82e-03 -4.65e-03 9.45e-04 -1.32e-03 -9.46e-04

-1.46e-03 8.04e-03 -1.62e-02 -2.29e-02 7.72e-02 3.16e-02 -2.37e-04 -3.14e-03 -8.62e-03 2.86e-03 -1.51e-03 -1.21e-03

-3.23e-03 -4.49e-03 -2.16e-02 4.26e-02 -1.28e-02 -7.45e-02 4.13e-03 3.34e-03 6.12e-03 4.33e-04 8.40e-04 1.39e-03

-1.87e-02 1.03e-03 2.89e-03 2.37e-02 2.05e-02 -5.54e-02 7.55e-03 5.26e-03 6.69e-04 -5.01e-04 2.44e-04 -2.20e-04

-1.07e-02 -1.68e-03 -1.46e-03 8.23e-03 1.08e-02 -3.86e-02 4.25e-03 2.39e-03 -3.86e-04 2.25e-04 4.52e-04 -9.58e-04

### Molecule 6

-7.36e-08 4.82e-04 3.55e-08 -1.03e-03 -1.05e-06 4.41e-02 -2.70e-06 2.26e-02 2.63e-06 3.93e-03 2.69e-03 -6.15e-07

4.38e-04 5.31e-07 9.19e-03 1.42e-06 -7.59e-03 -9.57e-07 -4.07e-04 5.06e-07 1.43e-02 7.99e-07 -2.38e-06 1.43e-02

1.56e-07 4.75e-03 6.75e-07 1.07e-02 -3.04e-07 3.42e-03 -1.42e-06 -4.81e-02 -5.19e-06 -3.19e-02 -5.81e-03 -2.93e-06

3.40e-03 6.32e-07 -6.98e-03 6.12e-07 -9.22e-03 -1.24e-06 -5.14e-03 -5.41e-06 8.30e-02 -



2.27e-06 -4.34e-06 1.92e-02  
-1.94e-06 -1.07e-02 2.20e-06 -3.06e-02 -6.38e-07 1.26e-01 -4.45e-06 8.89e-02 -2.51e-06  
1.18e-02 -2.07e-02 -3.24e-06  
4.86e-03 -4.04e-07 -9.26e-03 -2.17e-06 1.38e-02 1.75e-05 4.77e-02 -3.11e-07 -2.26e-03 -  
1.89e-06 -1.84e-07 -6.97e-04  
-6.88e-06 -1.56e-02 8.17e-06 -8.51e-02 -1.67e-05 1.20e+00 -1.74e-05 -9.78e-02 -8.77e-06  
5.31e-02 -3.88e-02 -1.24e-05  
3.30e-02 -8.17e-07 -8.39e-02 -5.88e-06 7.56e-02 -3.13e-05 -1.22e-02 5.63e-07 6.10e-03 -  
1.50e-06 1.68e-06 -2.81e-03  
4.05e-06 1.15e-02 -9.06e-06 1.13e-01 -6.76e-07 -4.01e-02 2.91e-07 -7.21e-03 -5.17e-07 -  
4.67e-03 5.68e-03 7.01e-07  
6.12e-05 1.46e-06 -2.66e-02 4.00e-07 3.45e-02 -7.75e-06 4.05e-03 9.72e-07 -3.21e-03 -9.72e-  
07 6.24e-07 -2.97e-03  
-4.28e-05 -2.18e-06 8.21e-03 -1.62e-06 -2.03e-02 3.54e-06 -4.37e-03 -1.11e-06 -1.03e-03  
1.29e-07 -1.60e-07 -3.86e-03  
-5.40e-07 1.84e-02 -1.38e-06 9.31e-03 -3.05e-06 -1.96e-02 2.16e-07 1.28e-02 7.14e-07 1.83e-  
03 2.21e-05 -1.14e-07

#### Molecule 7t

-1.95e-04 1.45e-04 6.21e-04 5.80e-05 -1.90e-03 8.32e-03 8.28e-04 1.62e-03 1.15e-02 -5.83e-  
04 9.18e-04 1.05e-04  
9.34e-04 -2.06e-03 -2.66e-03 -3.04e-04 1.31e-02 4.62e-03 -5.61e-03 -1.83e-03 -6.56e-02  
4.30e-03 2.42e-03 1.13e-03  
-1.33e-03 8.50e-03 1.23e-03 8.48e-04 1.95e-03 -4.55e-02 1.62e-03 1.51e-02 -1.15e-02 -2.15e-  
05 4.03e-04 -8.14e-04  
-1.73e-05 7.60e-04 -4.57e-05 -5.21e-05 9.12e-04 -4.18e-03 7.69e-05 2.07e-03 -5.06e-03  
6.65e-04 1.95e-04 1.88e-04  
-5.80e-03 4.31e-02 6.46e-03 2.97e-03 3.28e-04 1.40e-01 7.06e-04 8.74e-02 1.44e-03 -4.96e-  
03 -3.75e-03 -1.68e-04  
6.76e-04 -1.34e-03 2.83e-03 4.52e-04 1.80e-02 -7.62e-03 -2.88e-02 2.34e-03 2.72e-03 1.09e-  
03 1.06e-03 4.01e-04  
1.49e-02 -1.17e-01 -1.31e-02 -4.40e-03 3.79e-03 -1.27e+00 7.57e-03 6.30e-02 3.36e-03 -  
3.37e-03 -1.72e-03 -1.44e-03  
-1.11e-03 -9.66e-03 5.76e-02 6.05e-03 1.19e-01 7.10e-03 1.35e-02 -3.58e-05 1.52e-03 -4.36e-  
04 -1.89e-04 -1.41e-04

1.02e-02 -7.34e-02 -1.48e-02 -6.29e-03 5.30e-03 3.96e-02 6.55e-04 -1.36e-02 6.07e-04 6.59e-04 3.90e-04 2.00e-04

-3.04e-05 7.81e-03 -1.44e-03 7.71e-04 -6.52e-03 2.30e-02 -9.79e-04 -6.67e-04 -1.71e-04 1.29e-04 1.03e-04 5.58e-05

1.88e-03 4.87e-03 -6.94e-05 -4.81e-04 -4.10e-03 8.72e-03 -6.08e-04 -2.24e-04 -9.20e-05 1.11e-04 1.12e-04 6.78e-05

3.27e-05 9.19e-04 -6.42e-04 3.47e-04 -6.61e-04 1.92e-03 -3.34e-04 -2.64e-04 2.54e-04 3.37e-05 7.56e-05 -1.36e-05

### Natural Transition Orbital

The natural transition orbitals (NTO) are obtained diagonalization the TDM( $T$ ) provided above. The electron NTOs are eigenvectors of the matrix  $TT^\dagger$ , while the hole NTOs are eigenvectors of the matrix  $T^\dagger T$ . Integrals from the PySCF<sup>1-3</sup> program were used to obtain the transition dipole and the exchange integral between the hole and electron NTO pair with the largest eigenvalue.

### $\Delta E_{ST}$ of 1, 2, and 3t

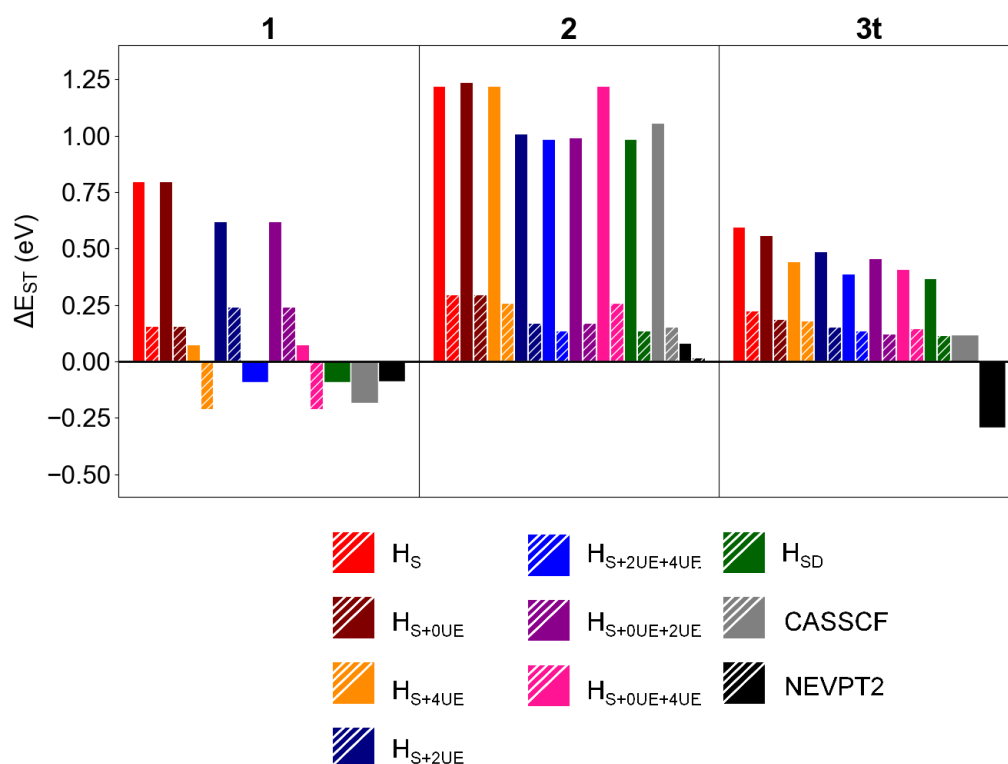

Figure S13.  $\Delta E_{ST}$  of molecules that have  $T_1$  states with differing characters from those of the  $S_1$  states. The hatched bars show the difference of energy between the  $S_1$  state and the triplet state that has the same configuration as its configuration with the largest coefficient.

## Reference

- 1) Recent developments in the PySCF program package, Q. Sun, X. Zhang, S. Banerjee, P. Bao, M. Barbry, N. S. Blunt, N. A. Bogdanov, G. H. Booth, J. Chen, Z.-H. Cui, J. J. Eriksen, Y. Gao, S. Guo, J. Hermann, M. R. Hermes, K. Koh, P. Koval, S. Lehtola, Z. Li, J. Liu, N. Mardirossian, J. D. McClain, M. Motta, B. Mussard, H. Q. Pham, A. Pulkin, W. Purwanto, P. J. Robinson, E. Ronca, E. R. Sayfutyarova, M. Scheurer, H. F. Schurkus, J. E. T. Smith, C. Sun, S.-N. Sun, S. Upadhyay, L. K. Wagner, X. Wang, A. White, J. Daniel Whitfield, M. J. Williamson, S. Wouters, J. Yang, J. M. Yu, T. Zhu, T. C. Berkelbach, S. Sharma, A. Yu. Sokolov, and G. K.-L. Chan, *J. Chem. Phys.* **153**, 024109 (2020)
- 2) PySCF: the Python-based simulations of chemistry framework, Q. Sun, T. C. Berkelbach, N. S. Blunt, G. H. Booth, S. Guo, Z. Li, J. Liu, J. McClain, S. Sharma, S. Wouters, and G. K.-L. Chan, *WIREs Comput. Mol. Sci.* **8**, e1340 (2018)
- 3) Libcint: An efficient general integral library for Gaussian basis functions, Q. Sun, *J. Comp. Chem.* **36**, 1664 (2015)
